# Supplementary material
Source: publisher site journal article supplement (https://www.dovepress.com/article/443036)
Supplement: Supplementary file 1 [file get_supplementary_file.php]

**Supplementary figure and legends**

**Supplementary Figure. 1**


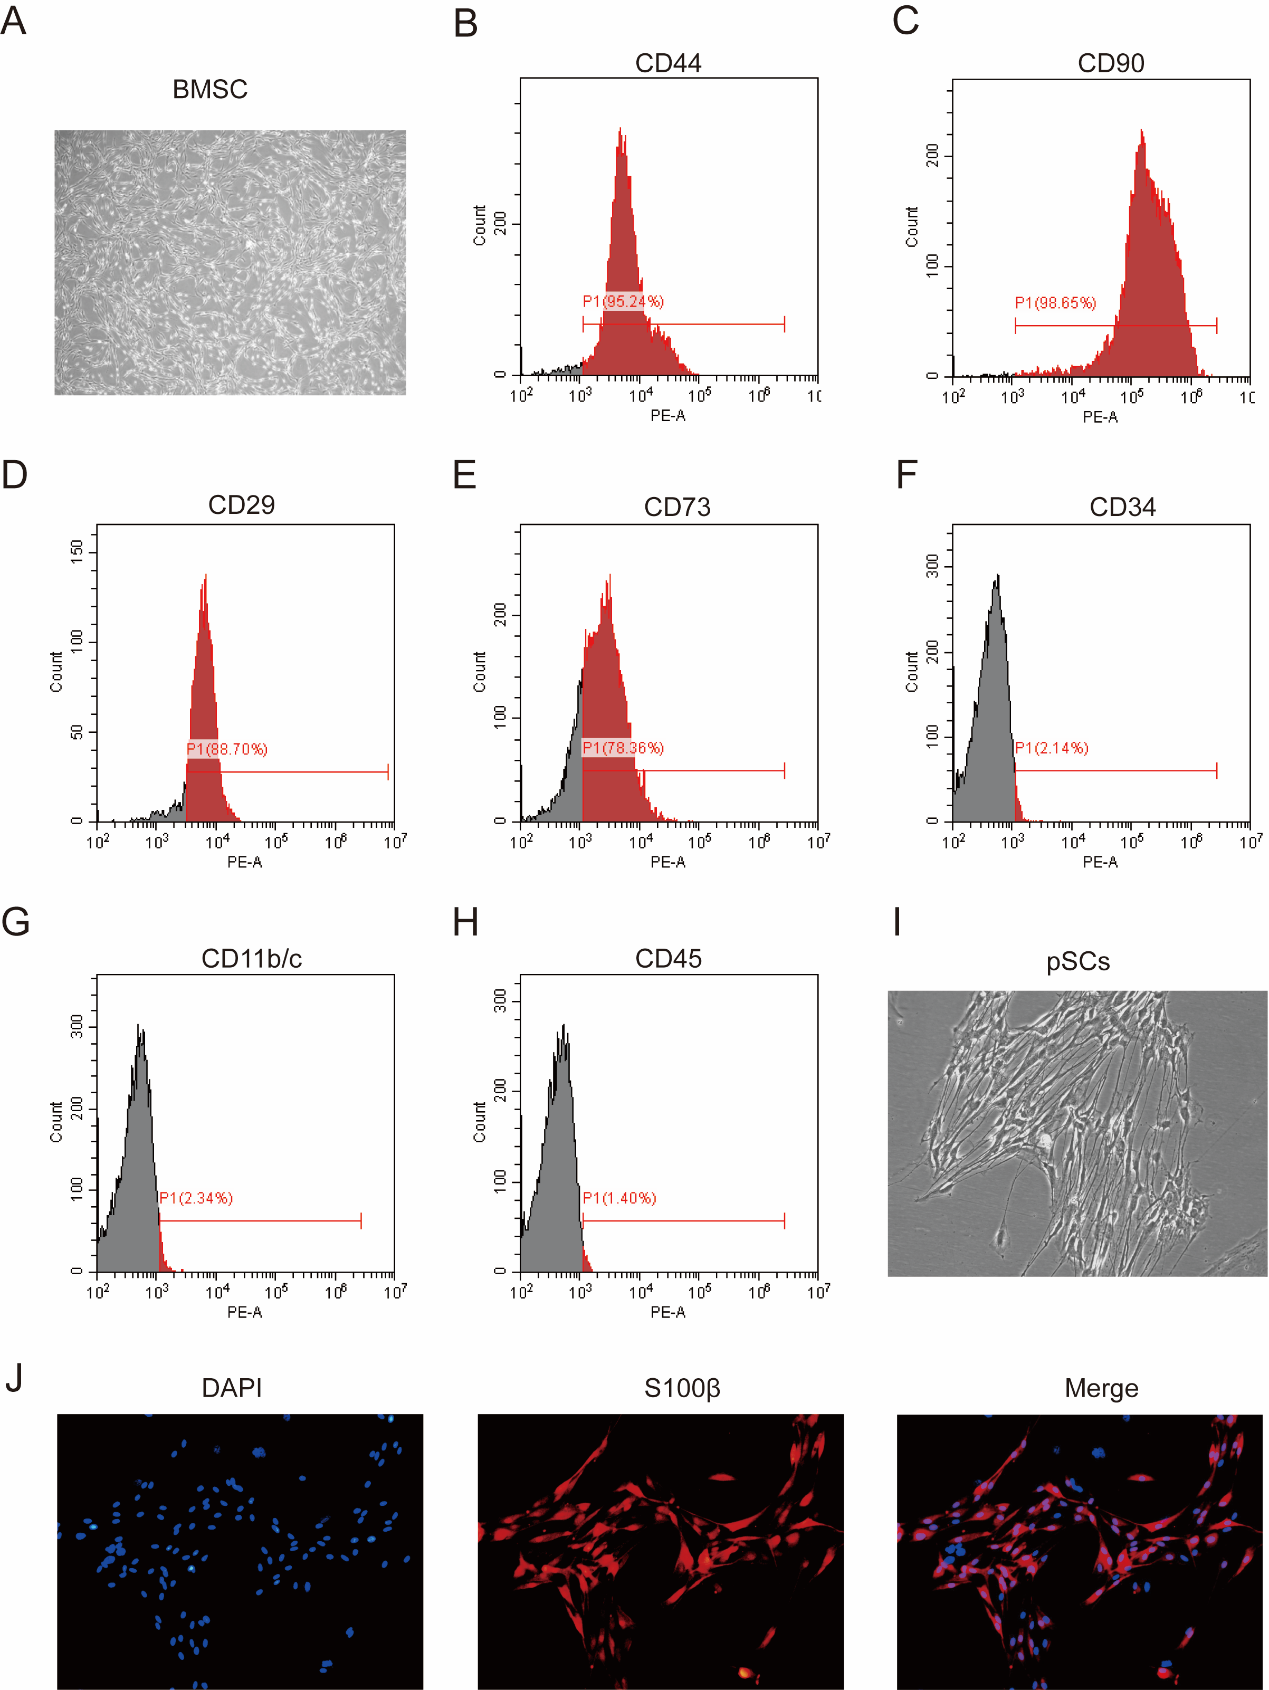


**Supplementary Figure 2**


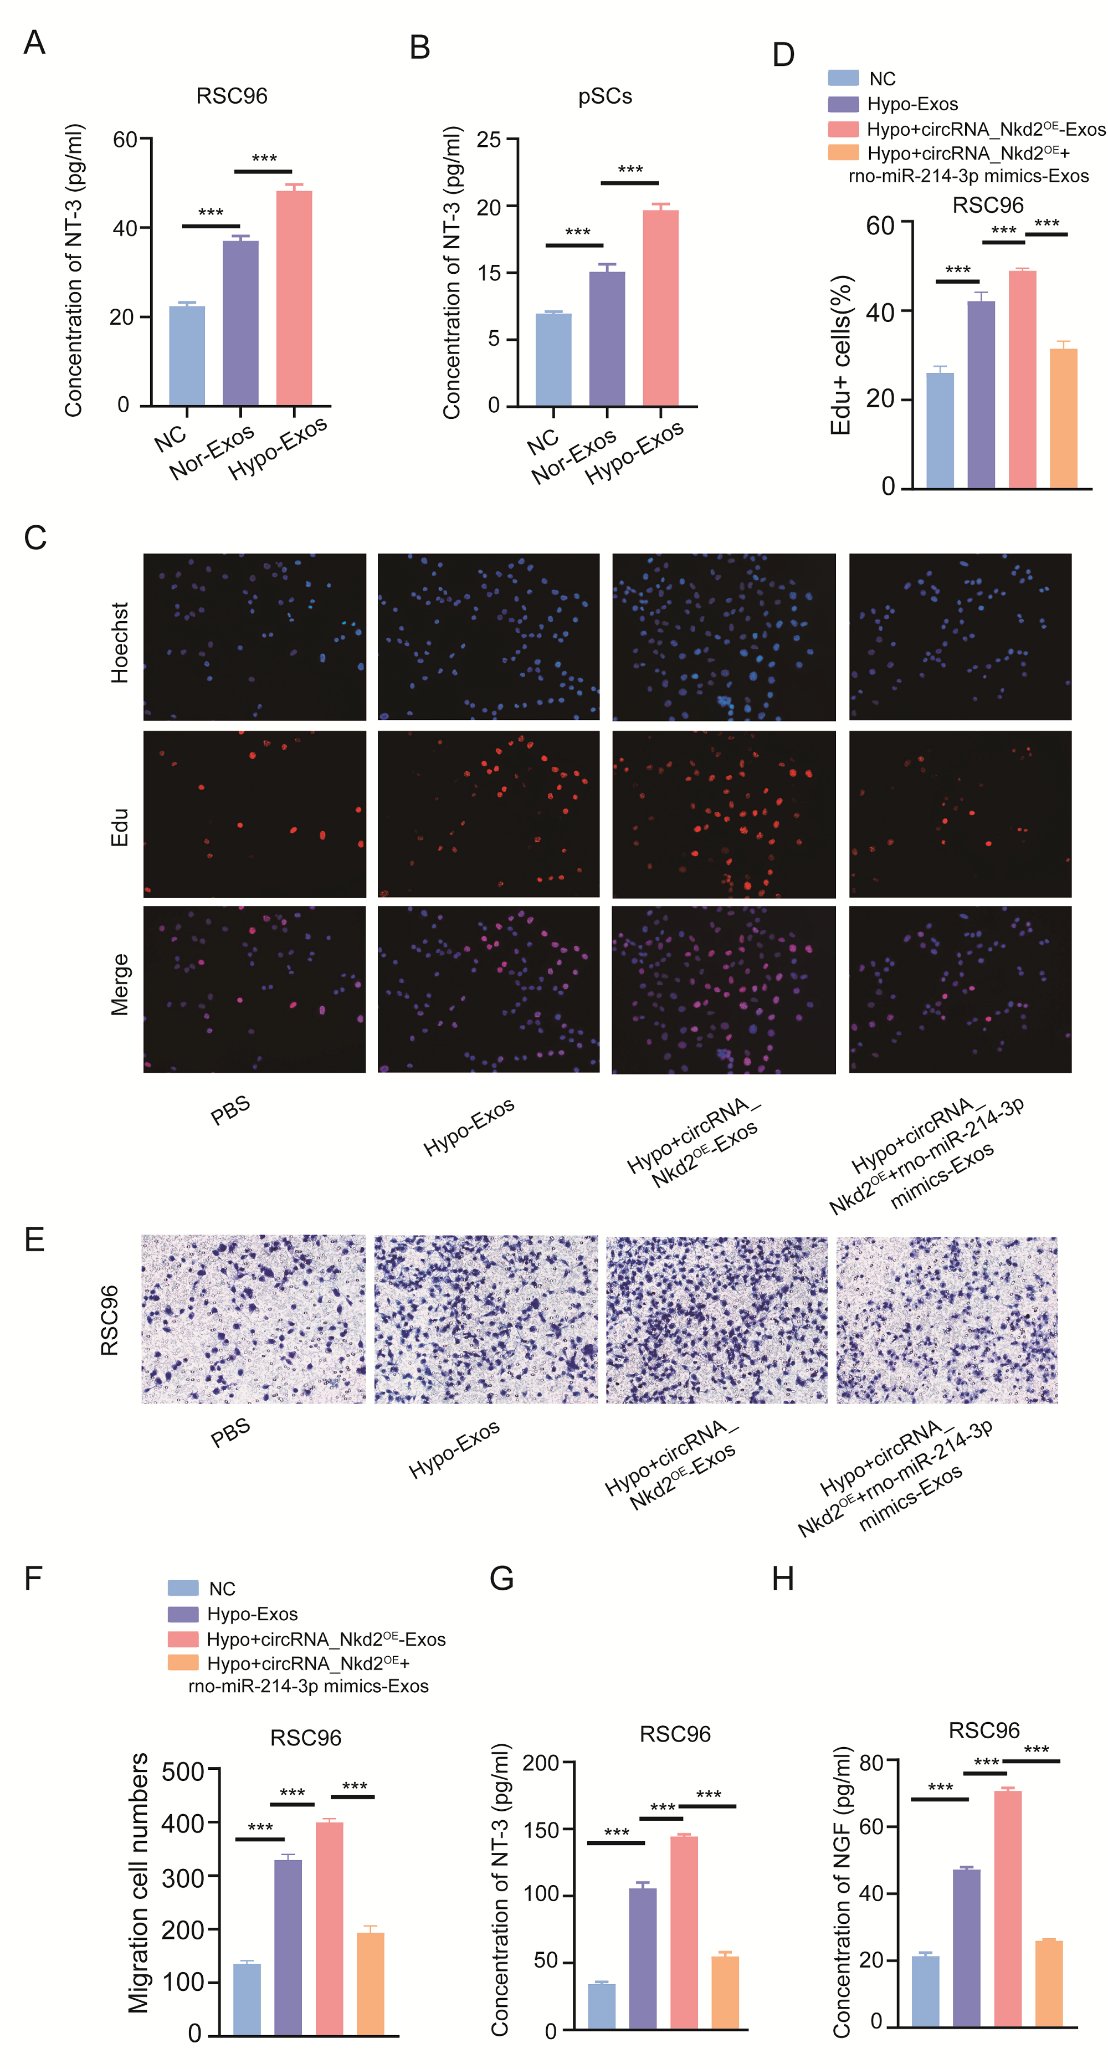


**Supplementary figure legends**

**Supplementary Figure. 1. Identification of BMSCs and pSCs.** **(A)** Cells adopted a long fusiform and distributed in a vortex after reaching 80%−90% confluent. **(B-H)** Flow cytometry analysis was applied to confirm that BMSCs were positive for CD44, CD90, CD29 and CD73 (B-E), but negative for CD34, CD11b/c and CD45 (G-H). **(I)** pSCs adopted a spindle-like shape after reaching 70%−80% confluent. **(J)** Immunofluorescence analysis was applied to confirm that pSCs were positive for S100β.

**Supplementary Figure 2. (A-B)** NT-3 secreted by RSC96 (A) and pSCs (B) in PBS, Nor-Exos, and Hypo-Exos treated groups were measured by Elisa. **(C-D)** Cell proliferation of RSC96 in Hypo-Exos, Hypo+circRNA_Nkd2OE-Exos, and Hypo+circRNA_Nkd2 OE+rno-miR-214-3p mimics-Exos treated groups were measured by EdU staining, equivalent amount of PBS was used as NC. **(E-F)** Migration of RSC96 in PBS, Hypo-Exos, Hypo+circRNA_Nkd2OE-Exos, and Hypo+circRNA_Nkd2 OE+rno-miR-214-3p mimics-Exos treated groups were measured by transwell migration assay. **(G-H)** NT-3 (G) and NGF (H) secreted by RSC96 in Hypo-Exos, Hypo+circRNA_Nkd2OE-Exos, and Hypo+circRNA_Nkd2 OE+rno-miR-214-3p mimics-Exos treated groups were measured by Elisa. (***, P<0.001)

**Supplementary table1**

**Table 1: Primer sequences**

| Primer name | Type | Sequence |
| --- | --- | --- |
| circRNA_Nkd2 | Forward primer | GTCAGGCTTTCGCTTCAAGG |
|  | Reverse primer | ATGCTCACCCAACACTGTTG |
| circRNA_45863503-45863702- | Forward primer | CTCTCATCTTTATGGCCAAGGC |
|  | Reverse primer | TGCTGCTGGTGGTAATGAGAG |
| circRNA_Pax7 | Forward primer | CCCACTGGAGCGGCACTG |
|  | Reverse primer | AGATTTGGGCACTAGATGGGAGAG |
| circRNA_Ttc39c | Forward primer | TGTGGGTGTCTGTGAGTGTATG |
|  | Reverse primer | ACTCCCATTCCTCACTTGCTG |
| circRNA_Fam110a | Forward primer | CTCTCCCTCTTAAAGACCGAATAGC |
|  | Reverse primer | CCAGCAGTCATTAGTCACCACAG |
| rno-miR-221-5p | Forward primer | CGCGACCTGGCATACAATGTA |
|  | Reverse primer | AGTGCAGGGTCCGAGGTATT |
|  | rno-miR-221-5p-1sl | GTCGTATCCAGTGCAGGGTCCGAGGTATTCGCA  CTGGATACGACGAAATC |
| rno-miR-214-3p | Forward primer | GGACAGCAGGCACAGAC |
|  | Reverse primer | TTGGGAGGTAGGAGGTTGAT |
|  | rno-miR-214-3p_1sl | GTTGGGAGGTAGGAGGTTGATATCC  TCCCAACCTGCCT |
| rno-miR-761 | Forward primer | CGGCAGCAGGGTGAAACT |
|  | Reverse primer | AGTGCAGGGTCCGAGGTATT |
|  | rno-miR-761-1sl | GTCGTATCCAGTGCAGGGTCCGAGGTAT  TCGCACTGGATACGACTGTGTC |
| rno-miR-222-5p | Forward primer | GCGGGCTCAGTAGCCAGT |
|  | Reverse primer | AGTGCAGGGTCCGAGGTATT |
|  | rno-miR-222-5p-1sl | GTCGTATCCAGTGCAGGGTCCGAGGTAT  TCGCACTGGATACGACATCTAC |
| rno-miR-129-2-3p | Forward primer | CGAAGCCCTTACCCCAAA |
|  | Reverse primer | AGTGCAGGGTCCGAGGTATT |
|  | rno-miR-129-2-3p-1sl | GTCGTATCCAGTGCAGGGTCCGAGGTATT  CGCACTGGATACGACATGCTT |
| U6 | Forward primer | CTCGCTTCGGCAGCACA |
|  | Reverse primer | AACGCTTCACGAA-TTTGCGT |
| MED19 | Forward primer | GGGCAGCACCAATTTAATCACACAC |
|  | Reverse primer | CCAGGGAGGTCAGGCAGGAAG |
| Zfand3 | Forward primer | AGAGCAGACCGAGGCAGCAG |
|  | Reverse primer | GGGACCAAGCGAAAGTGAAGAGG |
| Fbln5 | Forward primer | GCCAAGATGTGAACGAGTGTGAAAC |
|  | Reverse primer | ACAGCGGCAGATGAAAGAACCATAG |
| GAPDH | Forward primer | ACGGCAAGTTCAACGGCACAG |
|  | Reverse primer | CGACATACTCAGCACCAGCATCAC |
| Nkd2 | Forward primer | TTTAGTTGGGTGTGGCAGTGAATG |
|  | Reverse primer | GGCAGGCGAGGCAGTGTC |
